# Supplementary material
Source: PubMed Central journal article supplement (PMC10539028)

Supplemental Figure 1. GLUT4 receptor-mediated processing is disrupted in the *Dock3* KO myotubes

A.

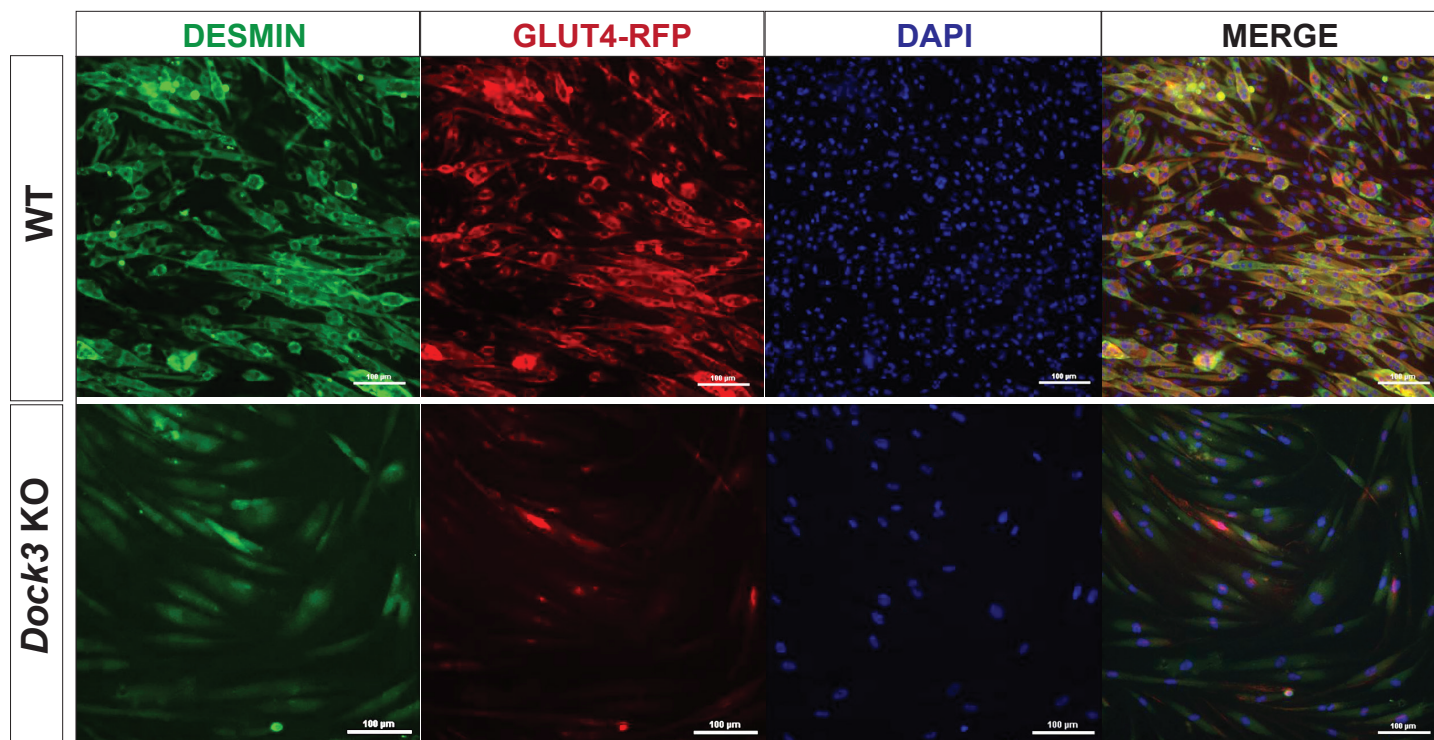

B.

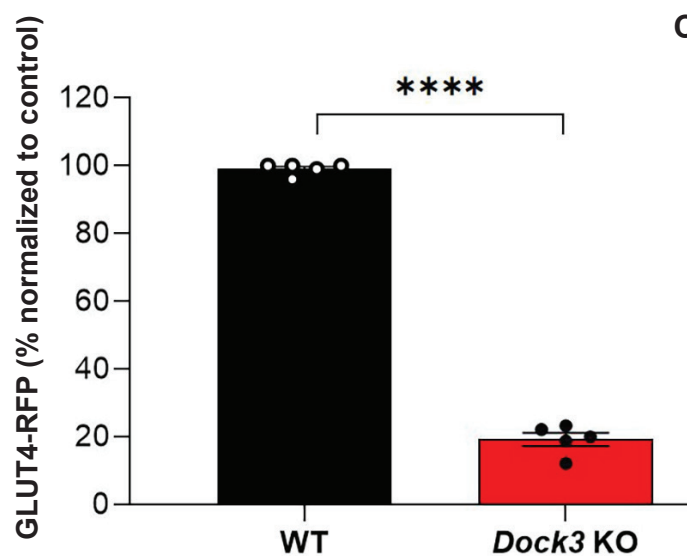

C.

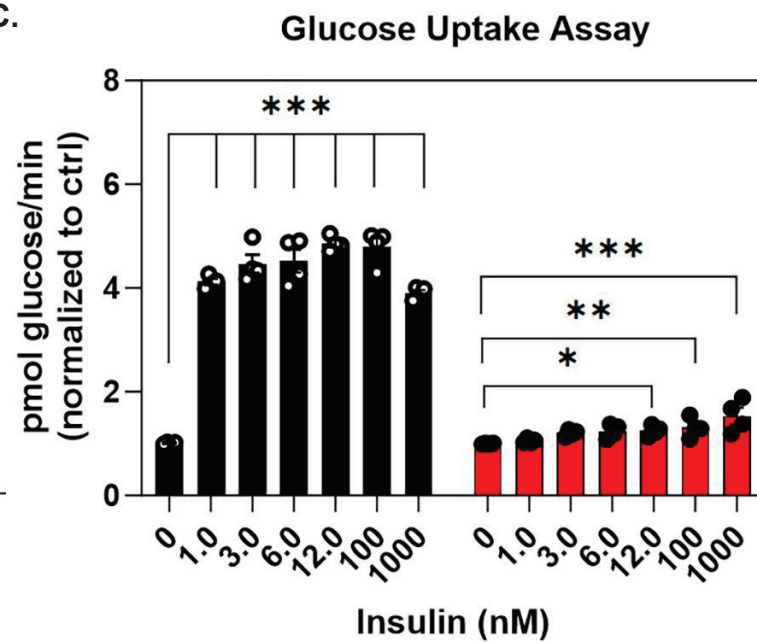

Supplement: NIHMS1930353-supplement-Fig_s1.pdf [file NIHMS1930353-supplement-Fig_s1.pdf]
